# Supplementary material
Source: Research Square preprint supplement (doi:10.21203/rs.3.rs-8609099/v1)
Supplement: Supplementary file 1 [file 0d6b6599482978c784eb9767.docx]

Appendix 1: DHS under 18 samples as a share of Anglophone/Francophone African regional populatiion

| **Francophone states** | | | | | | | | | | | | | | |
| --- | --- | --- | --- | --- | --- | --- | --- | --- | --- | --- | --- | --- | --- | --- |
| **Survey years** | **DHS U18 2002** | **DHS U18 2007** | **DHS U18 2012** | **DHS U18**  **2017** | **UN U18**  **2002 population (thousands)** | **UN U18**  **2007 population (thousands)** | **UN U18**  **2012 population (thousands)** | **UN U18 2017 population (thousands)** | **aAverage UN U18 regional population (thousands)** | **bRelative share of U18 2002 DHS/**  **regional population** | **Relative share of U18 2007 DHS /**  **regional population** | **Relative share of U18 2012 DHS/**  **regional population** | **Relative**  **share of U18 2017 DHS/**  **regional population** | **Average relative share of the UN U18 represented in the study** |
| Congo | 14527 | - | 25266 | - | 1625 | 1872 | 2226 | 2568 | 2073 | 24% |  | 32% |  | 28% |
| Gabon | 14746 | - | 19090 | - | 630 | 696 | 792 | 910 | 757 | 25% |  | 24% |  | 25% |
| Cameroon | 25095 | - | - | 28858 | 9162 | 8091 | 10432 | 11924 | 9902 | 42% |  |  | 32% | 37% |
| Madagascar | 18646 | 44910 | - | - | 9091 | 10427 | 11769 | 12879 | 11042 | 31% | 68% |  |  | 50% |
| Niger | - | 27209 | 37985 | - | 6672 | 8159 | 9968 | 11911 | 9178 |  | 46% | 49% |  | 47% |
| Guinea | - | 20083 | 23658 | 26319 | 4513 | 5032 | 5582 | 6151 | 5320 |  | 30% | 26% | 29% | 29% |
| Chad | 16170 | - | 59791 | - | 5044 | 6114 | 7296 | 8592 | 6762 | 27% |  | 77% |  | 52% |
| Burkina Faso | 32428 | - | 44221 | - | 6731 | 7721 | 8964 | 10290 | 8427 | 55% |  | 57% |  | 56% |
| Senegal | - | 35463 | 39535 | 21040 | 5293 | 5822 | 6537 | 7485 | 6284 |  | 54% | 51% | 24% | 43% |
| Mali | - | 40121 | 31936 | 29967 | 6566 | 7704 | 9156 | 10805 | 8558 |  | 61% | 41% | 33% | 45% |
| Benin | - | 48790 | 48454 | 39660 | 3973 | 4564 | 5227 | 5977 | 4935 |  | 74% | 51% | 44% | 56% |
| Total |  |  |  |  | 59300 | 66202 | 77949 | 89492 | 73236 |  |  |  |  | 43% |
| **Anglophone states** | | | | | | | | | | | | | | |
| **Survey years** | **DHS U18 2002** | **DHS U18 2007** | **DHS U18 2012** | **DHS U182017** | **UN U18**  **2002 population** | **UN U18**  **2007 population** | **UN U18**  **2012 population** | **UN U18 2017 population** | **Average UN U18 regional population** | **Relative share of U18 2002 DHS/**  **regional population** | **Relative share of U18 2007 DHS/**  **regional population** | **Relative**  **share of U18 2012 DHS/**  **regional population** | **Relative**  **share of U18 2017 DHS/**  **regional population** | **Average relative share of the UN U18 represented in the study** |
| Namibia | - | 18891 | 17906 |  | 901 | 924 | 950 | 1072 | 962 |  | 11% | 9% |  | 10% |
| Zimbabwe | - | 21219 | - | 20470 | 6024 | 6267 | 6900 | 7445 | 6659 |  | 12% |  | 9% | 11% |
| Lesotho | 16524 | 16675 | 14860 |  | 925 | 867 | 879 | 923 | 899 | 11% | 10% | 8% |  | 9% |
| Gambia | - | - | 26811 | 28177 | 818 | 926 | 1043 | 1164 | 988 |  |  | 14% | 13% | 13% |
| Ghana | 13166 | 21775 | 20452 |  | 10037 | 10985 | 12057 | 13314 | 11598 | 9% | 13% | 10% |  | 11% |
| Tanzania | 25022 | - | 25659 | 32557 | 18555 | 21394 | 24546 | 28219 | 23179 | 17% |  | 13% | 15% | 15% |
| Sierra Le | - | 21422 | 38856 | 36210 | 2503 | 2881 | 3237 | 3530 | 3038 |  | 12% | 20% | 16% | 16% |
| Zambia | - | 19165 | 45029 | 34594 | 5832 | 6748 | 7857 | 8937 | 7344 |  | 11% | 23% | 16% | 17% |
| Uganda | - | 25771 | 25285 | 49551 | 14552 | 16949 | 19383 | 21816 | 18175 |  | 15% | 13% | 23% | 17% |
| Kenya | 18360 | 19185 | 78061 | - | 17180 | 19380 | 21825 | 23509 | 20474 | 12% | 11% | 40% |  | 21% |
| Malawi | 32139 | - | 64826 | 64289 | 6271 | 7173 | 8295 | 9291 | 7758 | 21% |  | 33% | 29% | 28% |
| Nigeria | 17156 | 78738 |  | 95421 | 67066 | 77355 | 89436 | 100942 | 83700 | 11% | 46% |  | 43% | 34% |
| Total |  |  |  |  | 150664 | 171849 | 196408 | 220162 | 184771 |  |  |  |  | 17% |

*Dash represents absent DHS samples; aThe Relative share of the U18 population = the Percentage of DHS samples for each survey round divided by the total UN regional population estimates; bThe total U18 population represented in the study for each region.*

**Appendix 2: Relative indices of inequalities**

|  | **No formal schooling** | **Incomplete primary schooling** | **Low medical access** | **Low vaccine uptake** | **Single anthropometry failure** | **Multiple anthropometry failure** | **Low minimum dietary diversity** | |
| --- | --- | --- | --- | --- | --- | --- | --- | --- |
| Benin | 12 | 48 | 74 | 37 | 79 | 47 | 85 |
| Burkina Faso | 24 | 118 | 56 | 37 | 73 | 50 | 83 |
| Cameroon | 2 | 13 | 77 | 30 | 41 | 8 | 67 |
| Chad | 35 | 64 | 76 | 79 | 97 | 93 | 77 |
| Congo | 9 | 9 | 79 | 37 | 73 | 23 | 86 |
| Gabon | 104 | 3 | 76 | 96 | 24 | 22 | 81 |
| Gambia | 22 | 47 | 127 | 164 | 71 | 42 | 86 |
| Ghana | 5 | 20 | 73 | 45 | 44 | 31 | 60 |
| Guinea | 15 | 79 | 56 | 51 | 62 | 39 | 76 |
| Kenya | 2 | 32 | 92 | 31 | 50 | 19 | 28 |
| Lesotho | 5 | 25 | 88 | 59 | 46 | 35 | 72 |
| Madagascar | 3 | 26 | 70 | 17 | - | - | 42 |
| Malawi | 18 | 52 | 93 | 60 | 66 | 50 | 59 |
| Mali | 30 | 69 | 76 | 50 | 70 | 47 | 70 |
| Namibia | 14 | 13 | 91 | 60 | 46 | 31 | 42 |
| Niger | 30 | 175 | 71 | 45 | 83 | 69 | 71 |
| Nigeria | 1 | 20 | 47 | 26 | 65 | 25 | 58 |
| Senegal | 24 | 82 | 74 | 43 | 55 | 29 | 65 |
| Sierra Leone | 10 | 25 | 108 | 76 | 76 | 68 | 80 |
| Tanzania | 6 | 35 | 67 | 63 | 69 | 39 | 48 |
| Uganda | 7 | 39 | 90 | 98 | 74 | 38 | 71 |
| Zambia | 6 | 14 | 111 | 52 | 74 | 48 | 66 |
| Zimbabwe | 8 | 14 | 71 | 60 | 64 | 40 | 53 |

**Appendix 3: Slope indices of inequalities**

|  | **No formal schooling** | **Incomplete primary schooling** | **Low medical access** | **Low vaccine uptake** | **Single anthropometry failure** | **Multiple anthropometry failure** | **Low minimum dietary diversity** |
| --- | --- | --- | --- | --- | --- | --- | --- |
| Benin | -47 | -16 | -21 | -34 | -6 | -10 | -10 |
| Burkina Faso | -61 | 3 | -30 | -13 | -7 | -16 | -16 |
| Cameroon | -32 | -46 | -19 | -38 | -20 | -24 | -25 |
| Chad | -40 | -13 | -22 | -15 | -1 | -2 | -21 |
| Congo | -7 | -51 | -16 | -35 | -7 | -14 | -9 |
| Gabon | 0 | -55 | -17 | -3 | -18 | -8 | -14 |
| Gambia | -30 | -14 | 11 | 5 | -5 | -10 | -10 |
| Ghana | -19 | -32 | -18 | -14 | -14 | -12 | -24 |
| Guinea | -59 | -7 | -36 | -33 | -11 | -14 | -22 |
| Kenya | -11 | -54 | -5 | -17 | -14 | -18 | -49 |
| Lesotho | -9 | -56 | -7 | -10 | -21 | -11 | -22 |
| Madagascar | -41 | -50 | -23 | -46 | - | - | -42 |
| Malawi | -6 | -43 | -3 | -5 | -13 | -8 | -26 |
| Mali | -49 | -7 | -21 | -26 | -8 | -16 | -22 |
| Namibia | -6 | -50 | -5 | -9 | -13 | -15 | -49 |
| Niger | -59 | 10 | -21 | -38 | -4 | -11 | -27 |
| Nigeria | -71 | -14 | -33 | -68 | -10 | -26 | -28 |
| Senegal | -48 | -5 | -20 | -17 | -8 | -15 | -25 |
| Sierra Leone | -33 | -27 | 3 | -8 | -6 | -5 | -14 |
| Tanzania | -27 | -32 | -20 | -12 | -10 | -12 | -35 |
| Uganda | -8 | -53 | -4 | -1 | -7 | -11 | -18 |
| Zambia | -8 | -64 | 4 | -15 | -9 | -9 | -24 |
| Zimbabwe | -1 | -39 | -22 | -15 | -11 | -8 | -35 |
